# Supplementary material
Source: publisher figshare collection journal article supplement (https://sage.figshare.com/ndownloader/files/23553567)
Supplement: Supplementary file 1 [file 23553567]

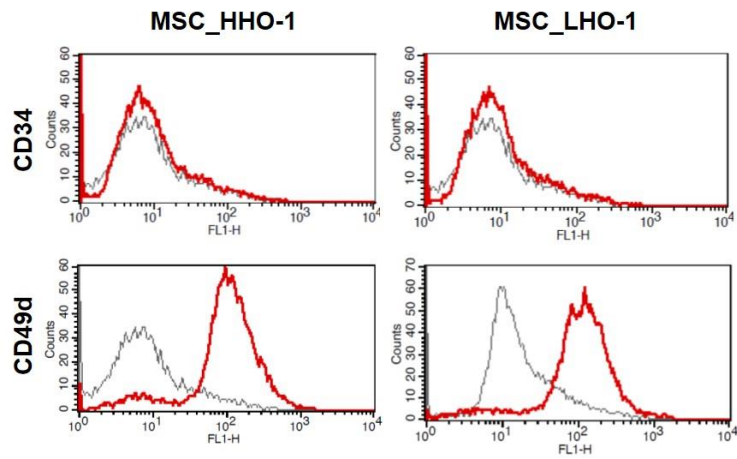

Supplementary figure 1. Flow cytometric analysis of surface markers on cultured Ad-MSCs with high (MSC\_HHO-1) or low expression (MSC\_LHO-1) of HO-1. Hematopoietic stem cell markers CD34 were not expressed. The MSCs-specific markers CD49d was expressed on cultured Ad-MSCs.
